# Supplementary material for: Ventilation Management in a Patient with Ventilation–Perfusion Mismatch in the Early Phase of Lung Injury and during the Recovery
Source: MDPI journal article supplement (doi:10.3390/jcm13030871), 2024-02-02
Supplement: s1 [file s1]

*Supplemental File S1*

# Ventilation Management in a Patient with Ventilation–Perfusion Mismatch in the Early Phase of Lung Injury and during the Recovery

Ana Cicvarić <sup>1,2,\*</sup>, Josipa Glavaš Tahtler <sup>1,2</sup>, Tajana Turk <sup>1,3</sup>, Sanda Škrinjarić-Cincar <sup>4</sup>, Despoina Koulenti <sup>5,6</sup>,  
Nenad Nešković <sup>1,2</sup>, Mia Edl <sup>1</sup> and Slavica Kvolik <sup>1,2,\*</sup>

<sup>1</sup> Faculty of Medicine, Josip Juraj Strossmayer University of Osijek, 31000 Osijek, Croatia; josipa.glavastahler@kbco.hr (J.G.T.); turk.tajana@kbco.hr (T.T.); neskovic@mefos.hr (N.N.); medl@mefos.hr (M.E.)

<sup>2</sup> Department of Anesthesiology, Resuscitation and Intensive Care, Osijek University Hospital, 31000 Osijek, Croatia

<sup>3</sup> Department of Radiology, Osijek University Hospital, 31000 Osijek, Croatia

<sup>4</sup> Department of Pulmonology, Osijek University Hospital, 31000 Osijek, Croatia

<sup>5</sup> 2nd Critical Care Department, Attikon University Hospital, 15772 Athens, Greece; deskogr@yahoo.gr

<sup>6</sup> UQ Centre for Clinical Research, Faculty of Medicine, The University of Queensland, Brisbane 4029, Australia

\* Correspondence: annikaa.dv@gmail.com (A.C.); skvolik@mefos.hr (S.K.);  
Tel.: +385-31-511-511 (A.C.); +385-31-511-502 (S.K.)

| Day                            | 1     | 2     | 3     | 4     | 5     | 6     | 7     | 8     | 9     | 10    | 11    | 13    | 14    | 15    | 16    | 17    | 18    | 19    | 20    | 21    | 22    | 23    |
|--------------------------------|-------|-------|-------|-------|-------|-------|-------|-------|-------|-------|-------|-------|-------|-------|-------|-------|-------|-------|-------|-------|-------|-------|
| <b>WBC(x10<sup>9</sup>/L)</b>  | 3.6   | 5.3   | 17.6  | 30.2  | 25.4  | 18.9  | 16.7  | 18.3  | 23.6  | 20.3  | 18.6  | 19.1  | 19.4  | 16.7  | 18.05 | 16.3  | 12.8  | 12.1  | 15.8  | 13.4  | 12.7  | 13    |
| <b>CRP(mg/L)</b>               | 523.9 | 388.7 | 428   |       | 246.4 | 218.5 | 147.4 | 207.9 | 153.5 | 228.7 |       | 145.5 | 164.5 | 191.5 |       | 203   | 183.9 | 188.4 | 192.1 | 190   | 222.1 | 159.2 |
| <b>PCT(ng/mL)</b>              |       | 35.88 | 44.55 | 28.36 | 13.97 | 7.32  | 3.43  | 1.53  | 0.93  | 0.65  |       |       |       |       |       |       |       |       |       |       |       |       |
| <b>RBC(x10<sup>12</sup>/L)</b> | 4.12  | 3.67  | 3.86  | 3.29  | 3.54  | 3.47  | 3.34  | 3.23  | 3.15  | 2.99  | 2.63  | 2.88  | 2.71  | 2.87  | 3.03  | 2.85  | 2.68  | 2.98  | 2.92  | 3.14  | 2.96  | 2.85  |
| <b>Hb(g/L)</b>                 | 132   | 118   | 125   | 105   | 114   | 111   | 107   | 103   | 102   | 96    | 86    | 92    | 87    | 92    | 93    | 89    | 85    | 93    | 91    | 96    | 89    | 87    |
| <b>Hct(L/L)</b>                | 0.384 | 0.343 | 0.363 | 0.315 | 0.34  | 0.335 | 0.326 | 0.322 | 0.312 | 0.298 | 0.255 | 0.276 | 0.262 | 0.27  | 0.289 | 0.275 | 0.26  | 0.28  | 0.274 | 0.299 | 0.284 | 0.274 |
| <b>PLT(x10<sup>9</sup>/L)</b>  | 180   | 138   | 158   | 121   | 105   | 67    | 60    | 68    | 135   | 190   | 251   | 335   | 378   | 349   | 362   | 361   | 316   | 295   | 280   | 244   | 309   | 312   |
| <b>Fibrinogen (g/L)</b>        |       |       |       |       |       |       |       |       | 3.9   |       |       |       |       |       |       |       |       |       |       | 4.4   |       |       |
| <b>Na(mmol/L)</b>              | 135   | 138   | 145   | 145   | 147   | 152   | 151   | 149   | 148   | 148   | 143   | 142   | 143   | 143   | 141   | 141   | 141   | 142   | 139   | 142   | 140   | 138   |
| <b>K(mmol/L)</b>               | 4.8   | 4.3   | 4.7   | 4     | 4.2   | 4.2   | 3.9   | 3.7   | 3.4   | 3.8   | 3.6   | 4     | 3.8   | 3.8   | 4.1   | 4.1   | 3.9   | 3.9   | 4     | 4     | 4.4   | 4.4   |
| <b>Albumin (g/L)</b>           |       |       | 21.8  | 18.8  | 23.9  |       |       | 18.6  | 18.5  |       |       | 19.9  |       |       |       | 22.4  |       |       |       | 23.4  |       |       |

Table S1 Laboratory indicators in the patient with severe lung injury and pneumonia caused by *Stenotrophomonas maltophilia*.

Note. WBC-white blood cell; CRP-C-reactive protein; PCT-procalcitonin; RBC-red blood cell; Hb-hemoglobin; Hct-hematocrit; PLT-platelet count; PT-prothrombin time; INR-international normalized ratio; aPTT-activated partial thromboplastin time; Na-sodium; K-potassium

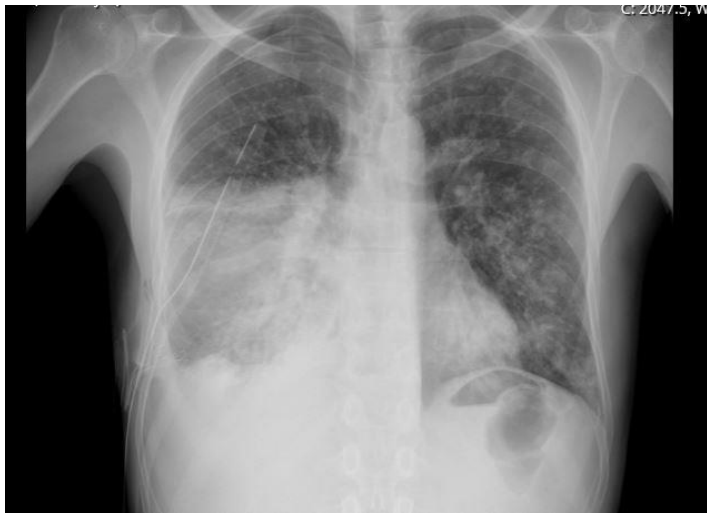

Figure S1. Day1\_Dec17

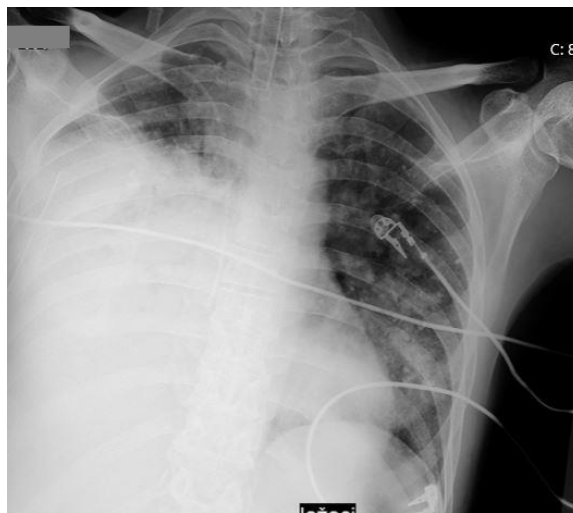

Figure S2. Day3\_Dec19

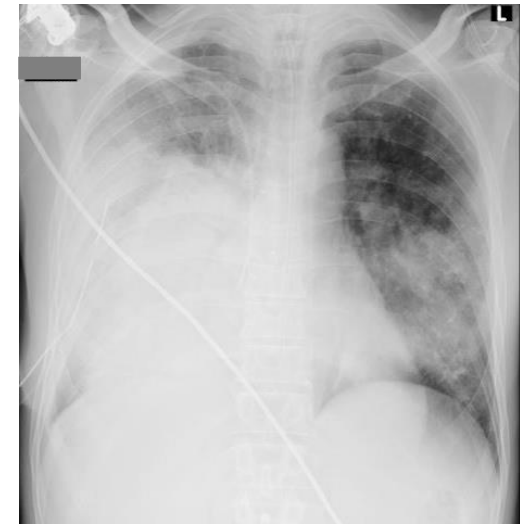

Figure S3. Day4\_Dec20

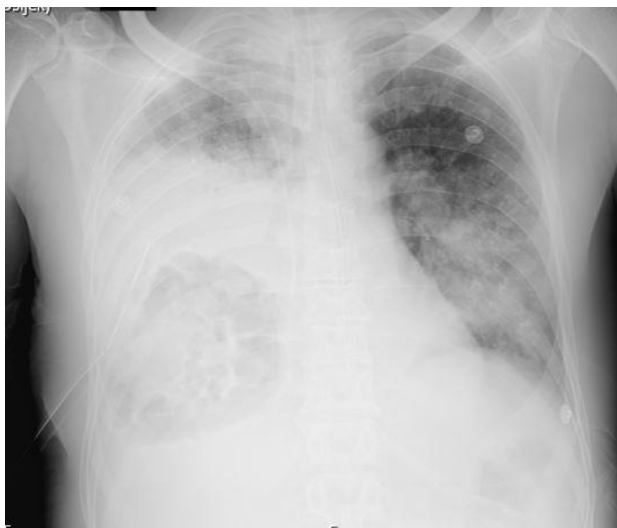

Figure S4. Day7\_Dec24.

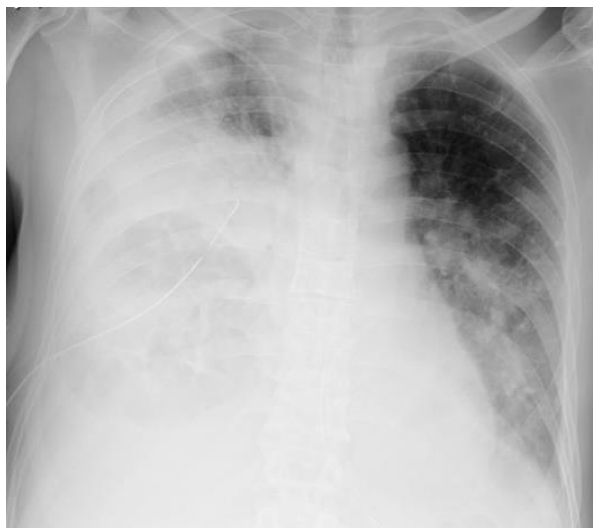

Figure S5. Day10\_Dec26

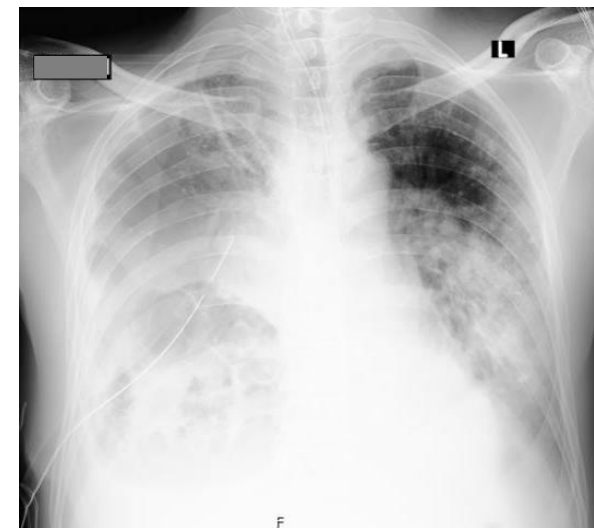

Figure S6. Day12\_Dec28

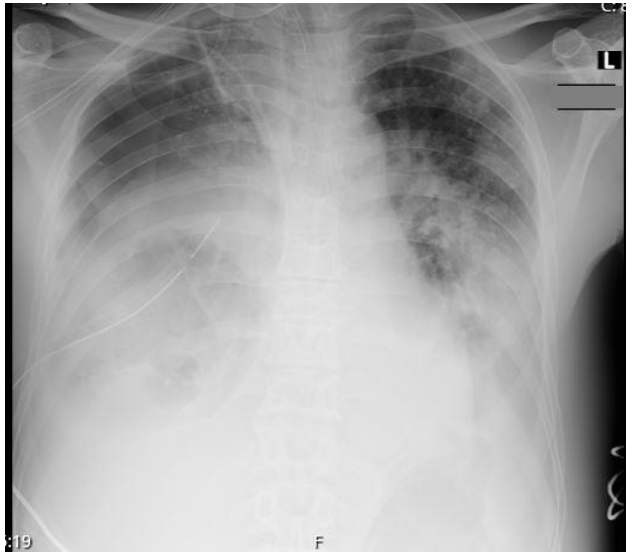

Figure S7. Day14\_Dec30

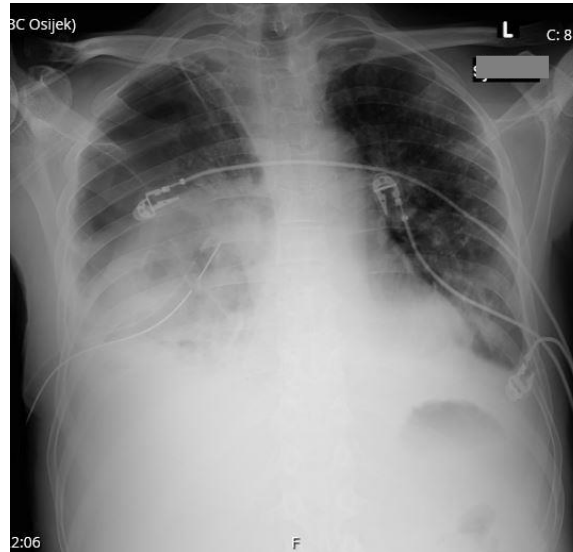

Figure S8. Day17\_Jan02.

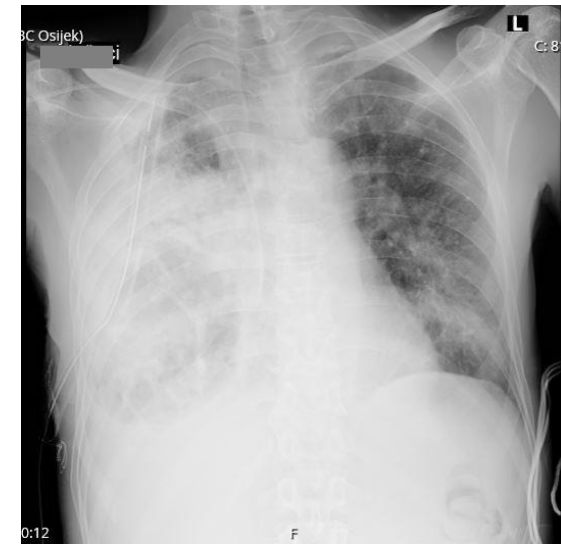

Figure S9. Day19.Jan04

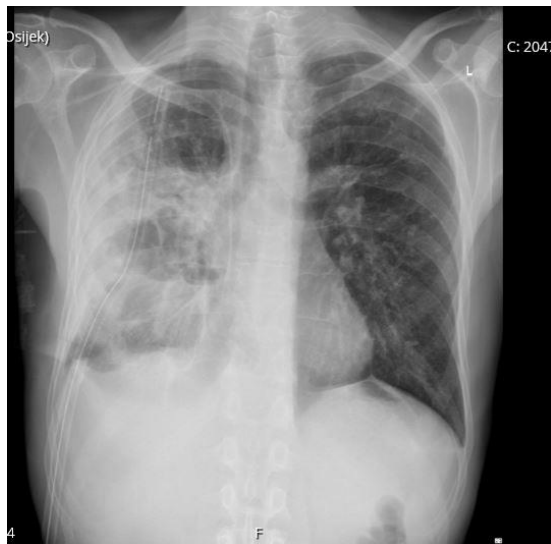

Figure S10. Day29\_Jan14
